# Supplementary material
Source: PubMed Central journal article supplement (PMC4494835)
Supplement: NIHMS4829-supplement-Supporting_Information.pdf [file NIHMS4829-supplement-Supporting_Information.pdf]

# Modeling Contaminants in AP-MS/MS Experiments

Mathieu Lavallée-Adam,<sup>†</sup> Philippe Cloutier,<sup>‡</sup> Benoit Coulombe,<sup>‡</sup> and Mathieu  
Blanchette<sup>\*,†</sup>

*McGill Centre for Bioinformatics and School of Computer Science, McGill University, Montréal,  
and Gene Transcription and Proteomics Laboratory, Institut de recherches cliniques de Montréal,  
Montréal*

E-mail: blanchem@mcb.mcgill.ca

Phone: 514-398-5209. Fax: 514-398-3387

## Supporting Information Available

### Protein and peptide identification software information

Peaklists were created using extract\_msn.exe version 2005-02-15 (Thermo Xcalibur) with the following parameters: minimum mass: 600, maximum mass: 6000, minimum number of fragment ions: 10, no grouping of MS/MS spectra was performed, and precursor charge was set to automatic. Mascot 2.2.04 (Matrix Science) was used for protein database searching with precursor-ion mass tolerance set to 10 ppm and fragment-ion mass tolerance set to 0.6 Da. The modifications allowed were carbamidomethylation and oxidation of methionine. Finally, the digestion enzyme used was trypsin and 2 missed cleavages were allowed. Database searching was performed on the human NCBI nr protein database (version 2009-04-02), which contains 10 427 007 sequences.

---

\*To whom correspondence should be addressed

<sup>†</sup>McGill Centre for Bioinformatics and School of Computer Science, McGill University, Montréal

<sup>‡</sup>Gene Transcription and Proteomics Laboratory, Institut de recherches cliniques de Montréal, Montréal

## Computation of corrected averages for Mascot scores

We note that in most AP-MS/MS applications, preys with Mascot scores below a certain threshold  $m$  (e.g. a fixed value  $m = 20$ , or the Mascot Identity Threshold<sup>1</sup>) are discarded and not reported, as being likely protein identification errors. In our approach, when a protein  $p$  is not reported as a possible partner of bait  $b$ , we arbitrarily set its Mascot score  $M_{b,p}^{NI}$  to zero. The set of observed Mascot scores for a given prey thus follow a type I censored distribution.<sup>2</sup> Let  $B'_p$  be the set of control experiments for which  $M_{b,p}^{NI} < m$ . Assuming the uncensored  $\bar{M}_p^{NI}$  follows a normal distribution, a better estimate of  $\mu_{\neq b,p}$  is thus obtained from the Persson-Rootzen method:<sup>3</sup>

$$\mu_{\neq b,p} = \frac{1}{|B'_p|} \sum_{b \in B'_p} M_{b,p}^{NI} - \gamma_p \sigma',$$

where  $\gamma_p = \phi(\lambda_{|B'_p|/|B|})|B|/|B'_p|$ ,  $\phi$  is the probability density function of the standard normal distribution,

$$\sigma' = \frac{1}{2} \left[ \lambda_{|B'_p|/|B|} \frac{1}{|B'_p|} \sum_{b \in B'_p} (M_{b,p}^{NI} - m) + \left\{ \left( \lambda_{|B'_p|/|B|} \frac{1}{|B'_p|} \sum_{b \in B'_p} (M_{b,p}^{NI} - m) \right)^2 + \frac{4}{|B'_p|} \sum_{b \in B'_p} (M_{b,p}^{NI} - m)^2 \right\}^{\frac{1}{2}} \right],$$

and where  $\lambda_{|B'_p|/|B|}$  denotes the upper  $(|B'_p|/|B|)^{th}$  quantile of the standard normal distribution. If  $M_{b,p}^{NI} = 0 \forall b \in B$  for a given  $p$ , we set arbitrarily one  $M_{b,p}^{NI}$  to be equal to  $m + 1$ .

## $C^c$ correction factor derivation

In order to correct the  $C^s$  matrix for induced experiments noise modeling, we used the following correction:

$$C^c(i, j) = C^s(i, j) \cdot \frac{I(j)}{NI(j)}$$

The above correction was derived the following way. The matrix  $C^s$  corresponds to the joint

probability of  $\bar{M}_p^{NI}$  and  $M_{b,p}^{NI}$  given that the data was generated from control experiments.

$$C^s(i, j) = \Pr[\bar{M}_p^{NI} = j, M_{b,p}^{NI} = i | control] = \Pr[\bar{M}_p^{NI} = j | control] \cdot \Pr[M_{b,p}^{NI} = i | \bar{M}_p^{NI} = j, control]$$

We make the assumption that the noise of a Mascot score is independent of whether the experiment was induced or not. Therefore:

$$\Pr[M_{b,p}^{NI} = i | \bar{M}_p^{NI} = j, control] = \Pr[M_{b,p}^{NI} = i | \bar{M}_p^{NI} = j]$$

Similarly, let  $C^c$  correspond to the joint probability of  $\bar{M}_p^{NI}$  and  $M_{b,p}^{NI}$  given that the data was generated from induced experiments.

$$C^c(i, j) = \Pr[\bar{M}_p^{NI} = j, M_{b,p}^{NI} = i | induced] = \Pr[\bar{M}_p^{NI} = j | induced] \cdot \Pr[M_{b,p}^{NI} = i | \bar{M}_p^{NI} = j]$$

Following from the above assumption,

$$C^c(i, j) = \Pr[\bar{M}_p^{NI} = j | induced] \cdot \frac{\Pr[\bar{M}_p^{NI} = j, M_{b,p}^{NI} = i | control]}{\Pr[\bar{M}_p^{NI} = j | control]}$$

which give us the correction factor for  $C^s$  in order to get  $C^c$ .

$$C^c(i, j) = C^s(i, j) \cdot \frac{\Pr[\bar{M}_p^{NI} = j | induced]}{\Pr[\bar{M}_p^{NI} = j | control]}$$

or as described in the Methods section:

$$C^c(i, j) = C^s(i, j) \cdot \frac{I(j)}{NI(j)}$$

This material is available free of charge via the Internet at <http://pubs.acs.org/>.

## References

- (1) Perkins, D.; Pappin, D.; Creasy, D.; Cottrell, J.; et al., *Electrophoresis* **1999**, *20*, 3551–3567.
- (2) Bernholtz, B. *Statistical Papers* **1977**, *18*, 2–12.
- (3) Persson, T.; Rootzen, H. *Biometrika* **1977**, *64*, 123.
